# Supplementary material for: Rice husk-derived Mn3O4/manganese silicate/C nanostructured composites for high-performance hybrid supercapacitors
Source: Royal Society of Chemistry journal article supplement (doi:10.1039/c9qi00766k), 2019-01-01
Supplement: c9qi00766k1.pdf [file c9qi00766k1.pdf]

## Supporting Information

for

### **Rice Husk-Derived Mn<sub>3</sub>O<sub>4</sub>/Manganese Silicate/C Nanostructured Composites for High- Performance Hybrid Supercapacitors**

Hanmei Jiang<sup>1</sup>, Yifu Zhang<sup>\*,1,2</sup>, Chen Wang<sup>1</sup>, Qiushi Wang<sup>1</sup>, Changgong Meng<sup>1</sup>, John Wang<sup>\*,2</sup>

<sup>1</sup>*School of Chemical Engineering, Dalian University of Technology, Dalian 116024, PR China*

<sup>2</sup>*Department of Materials Science and Engineering, National University of Singapore, 117574 Singapore,  
Singapore*

\*E-mail addresses: yfzhang@dlut.edu.cn; msewangj@nus.edu.sg

Figure S1

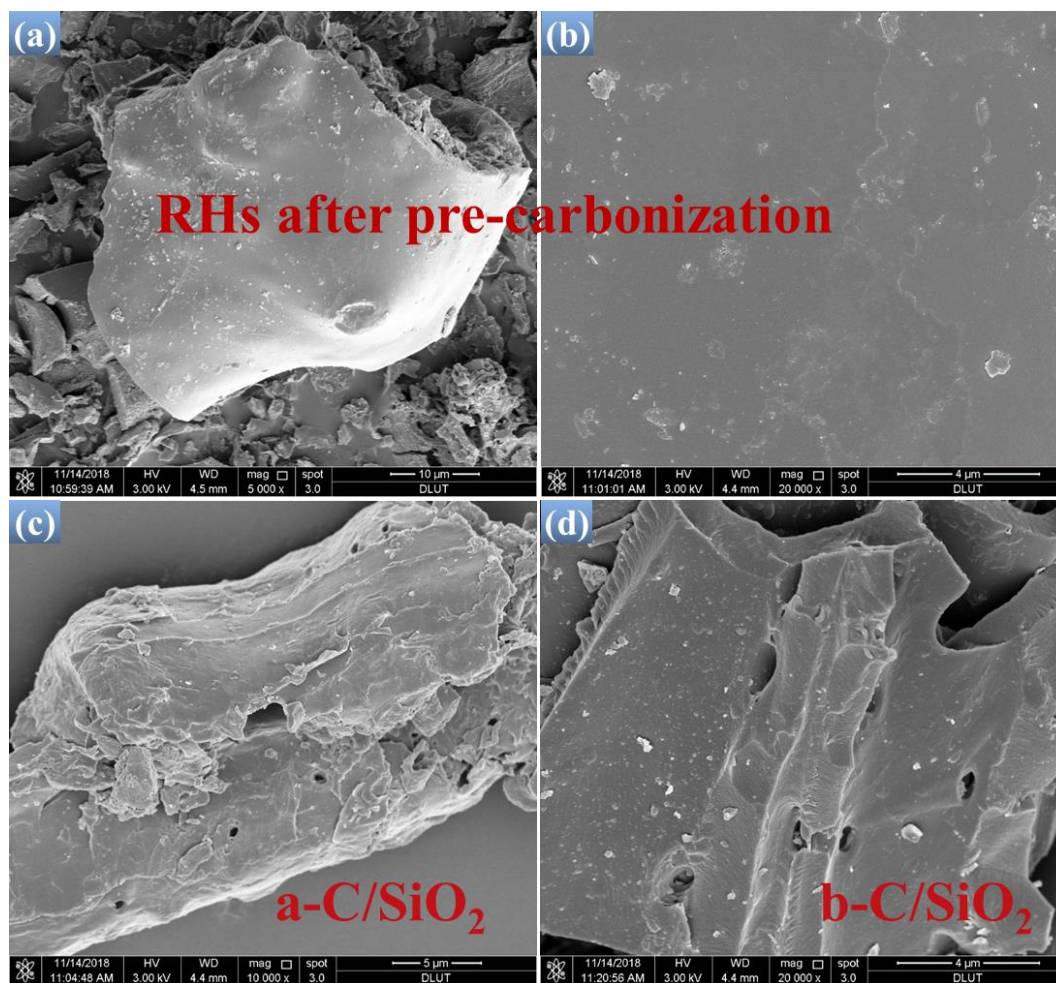

Figure S1. FE-SEM images of (a-b) RHs after pre-carbonization; (c) a-C/SiO<sub>2</sub> and (d) b-C/SiO<sub>2</sub>.

**Figure S2**

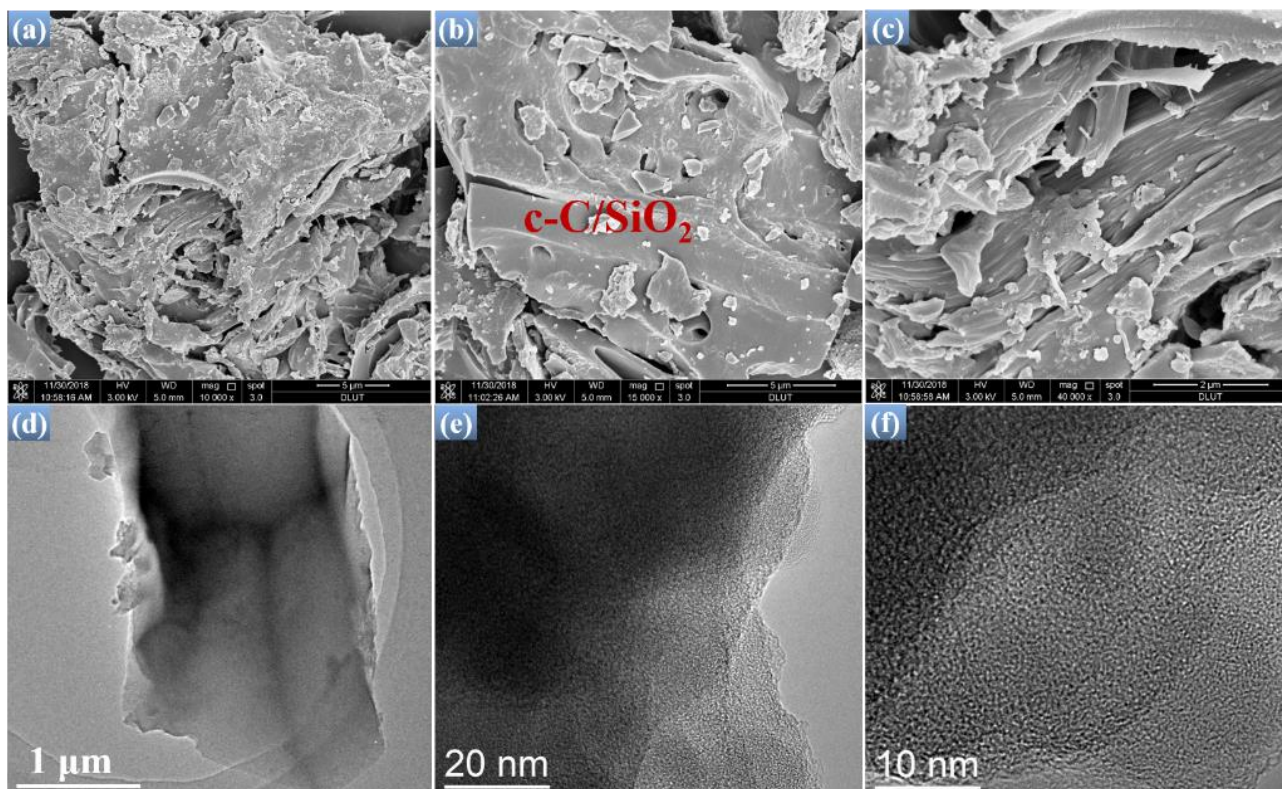

**Figure S2.** (a-c) FE-SEM images of c-C/SiO<sub>2</sub>; (d-f) TEM images of c-C/SiO<sub>2</sub>.

Figure S3

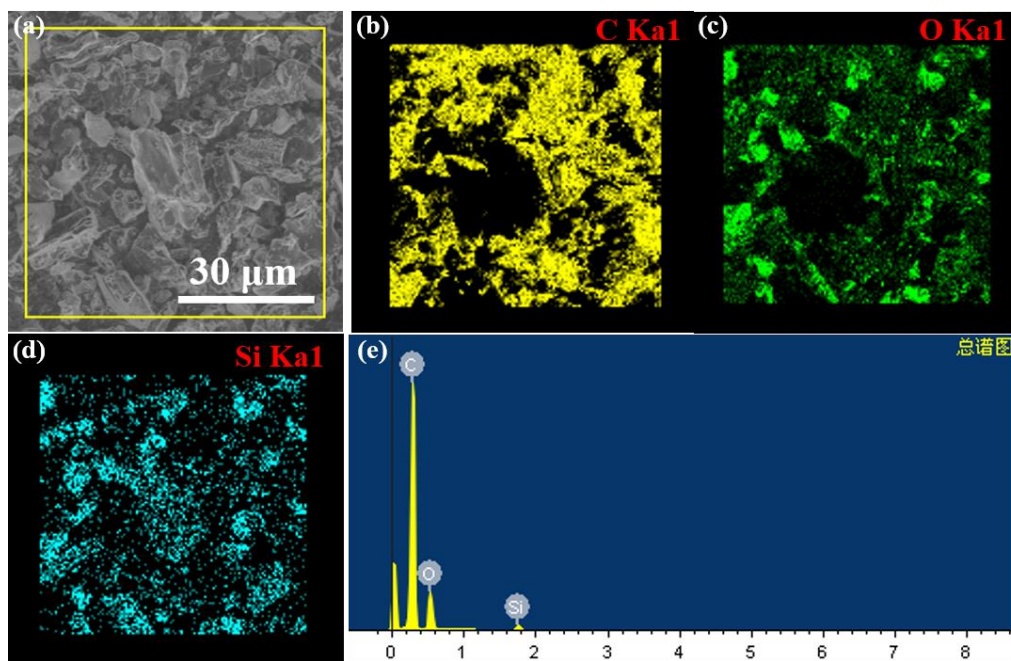

Figure S3. EDS spectrum and elemental mapping images of c-C/SiO<sub>2</sub>.

Figure S4

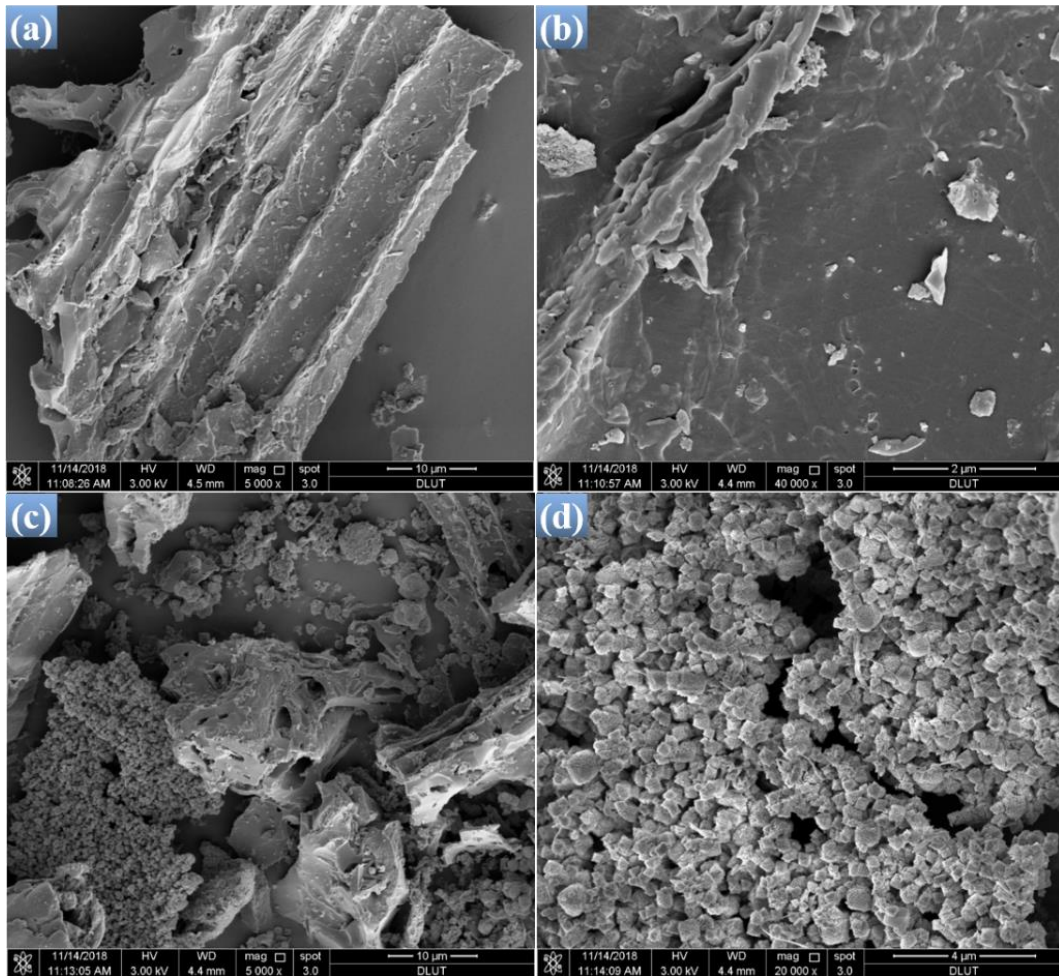

Figure S4. (a-b) FE-SEM images of c-MnSi-0.8; (d-f) FE-SEM images of c-MnSi-3.



Figure S6

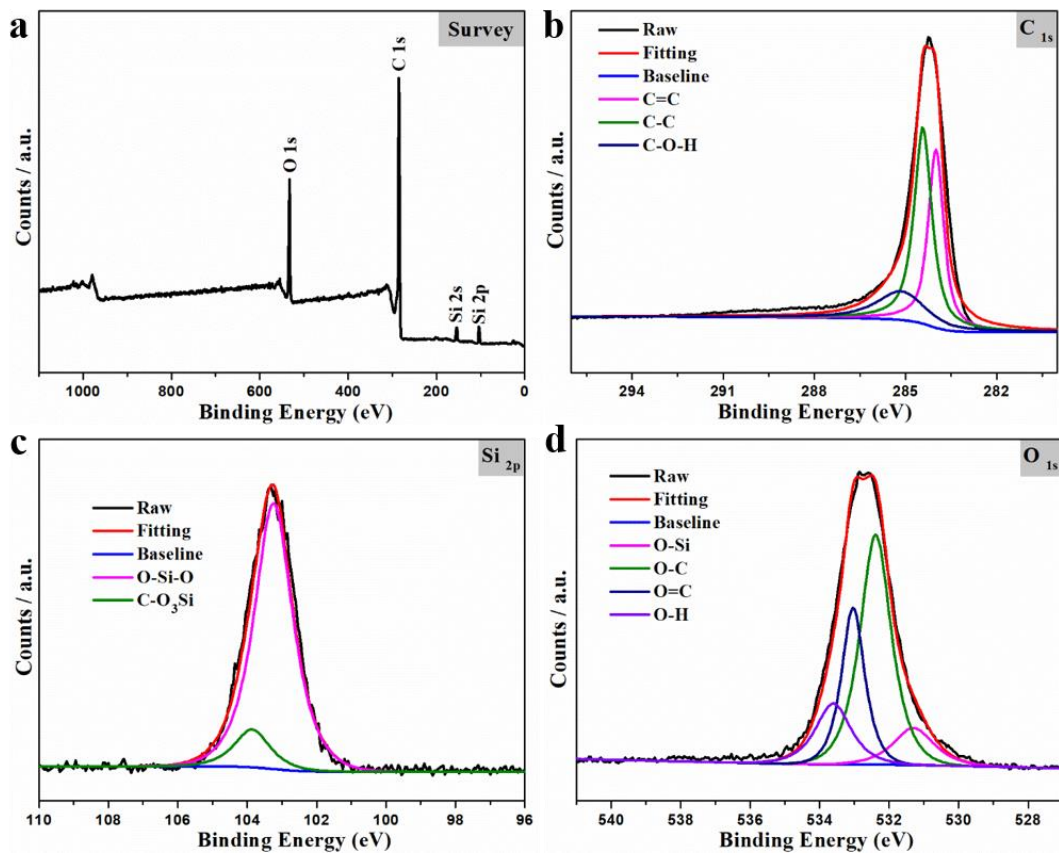

Figure S6. XPS spectra of c-C/SiO<sub>2</sub>: (a) Survey XPS spectrum; (b-d) High-resolution spectra of C<sub>1s</sub>, Si<sub>2p</sub>, O<sub>1s</sub>, respectively.

Figure S7

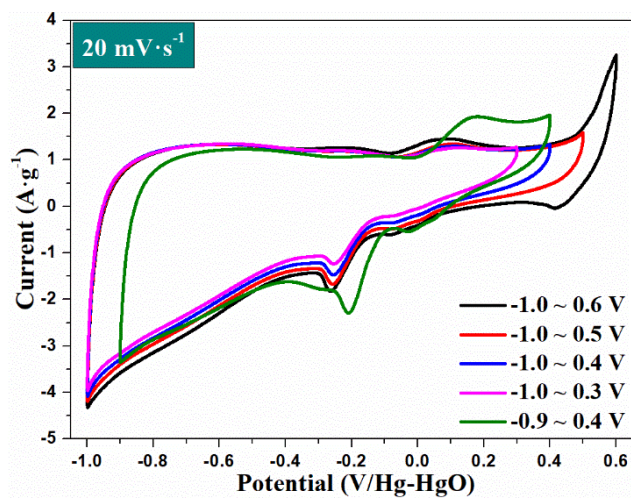

Figure S7. CV curves of c-MnSi-2 at various voltage windows.

Figure S8

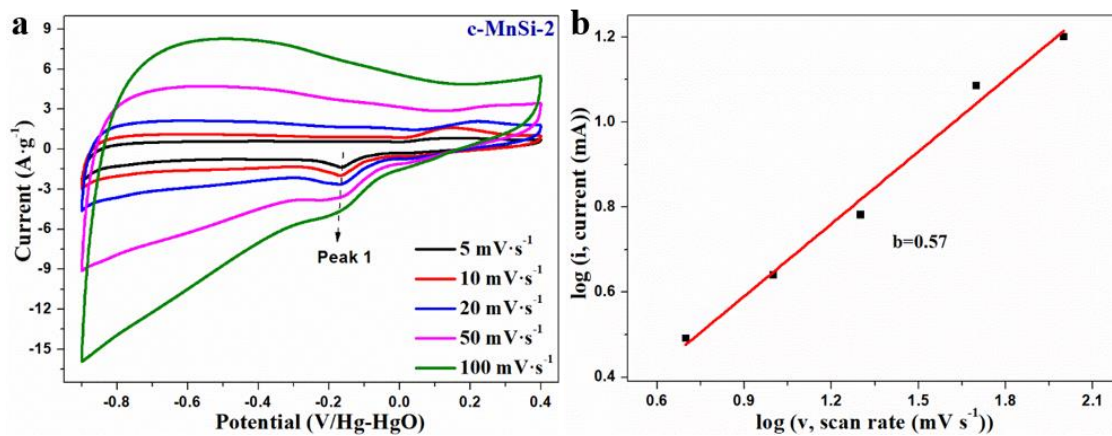

Figure S8. (a) CV curves of c-MnSi-2 and (b)  $\log(i)$  vs  $\log(v)$  plots based on peak 1.



Figure S9

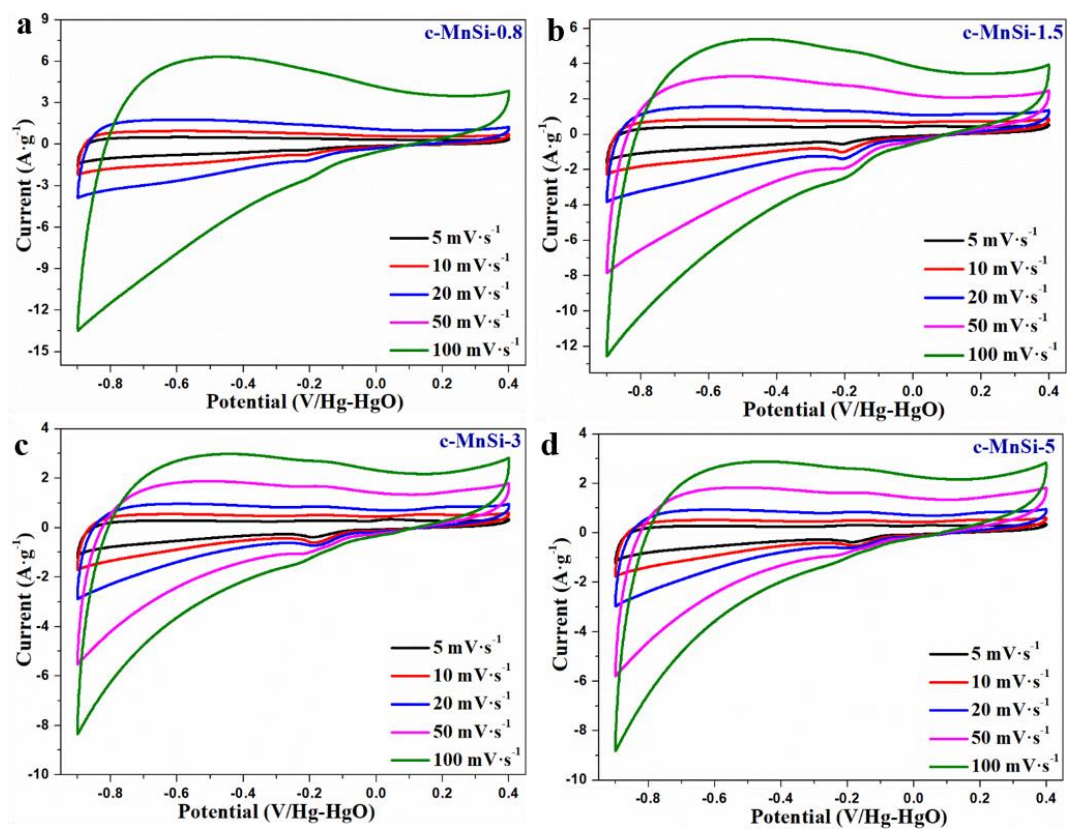

Figure S9. CV curves of the as-prepared samples with various ratios of Mn/Si at different scan rates from 5  $mV \cdot s^{-1}$  to 100  $mV \cdot s^{-1}$ .

Figure S10

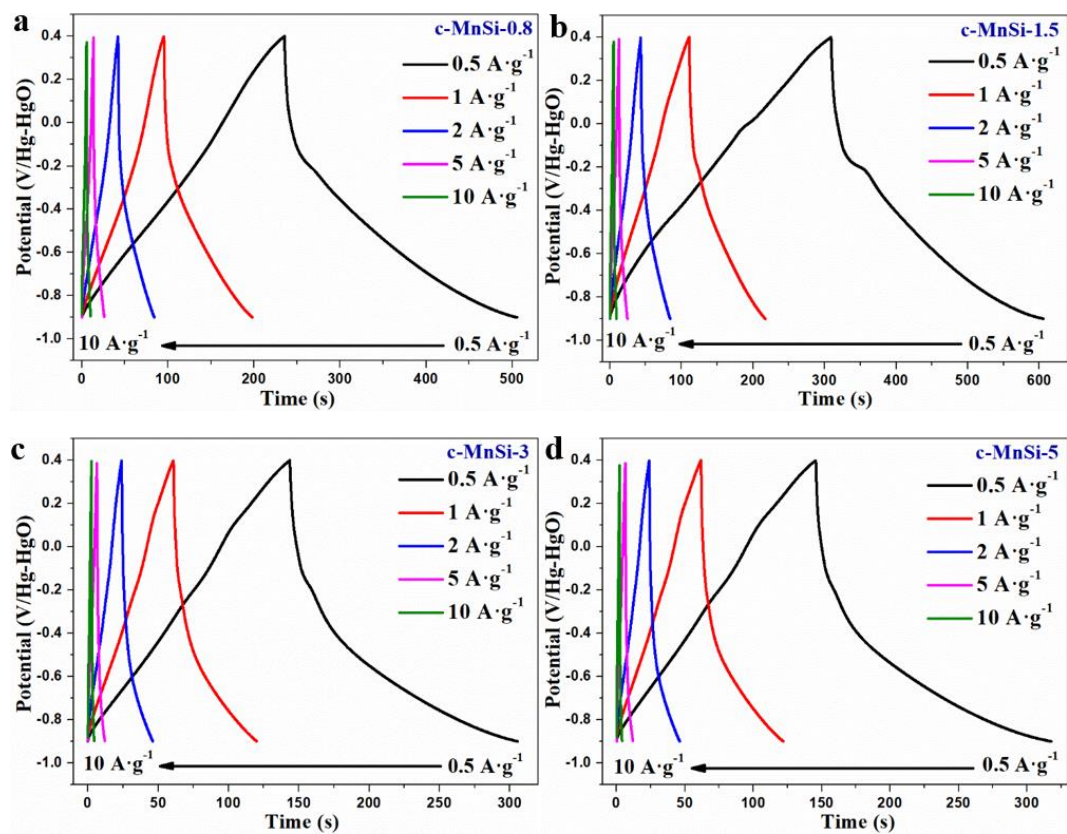

Figure S10. GCD curves of the as-prepared samples with various ratios of Mn/Si at different current densities from 0.5 A g<sup>-1</sup> to 10 A g<sup>-1</sup>.

Figure S11

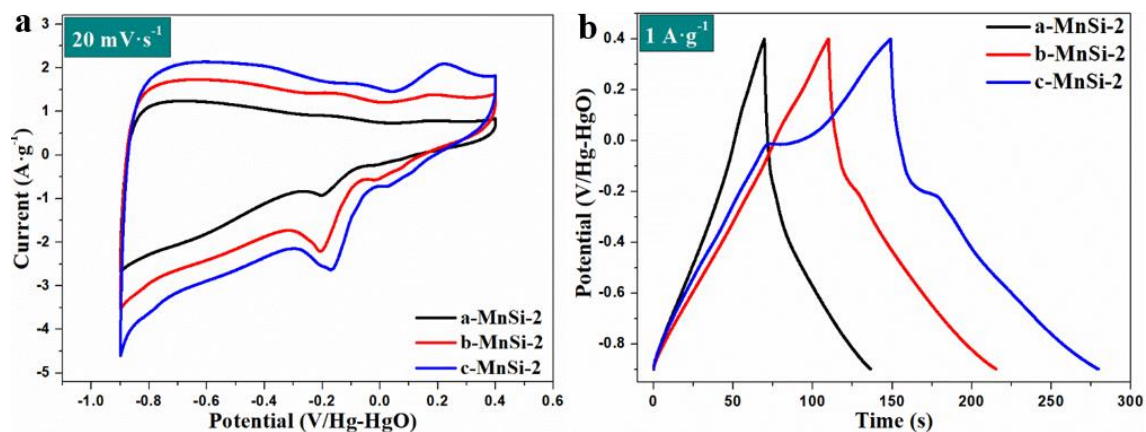

Figure S11. (a) CV curves and (b) GCD curves of as-prepared samples in different active ratios.

Figure S12

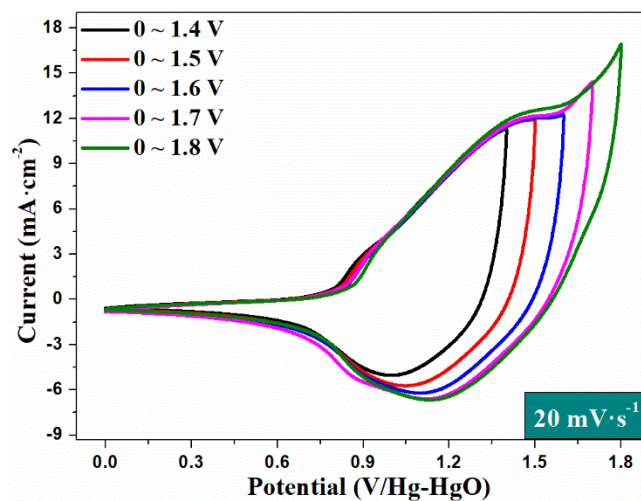

Figure S12. CV curves of c-MnSi-2//Ni(OH)<sub>2</sub> HSC on various potential limits.

**Figure S13**

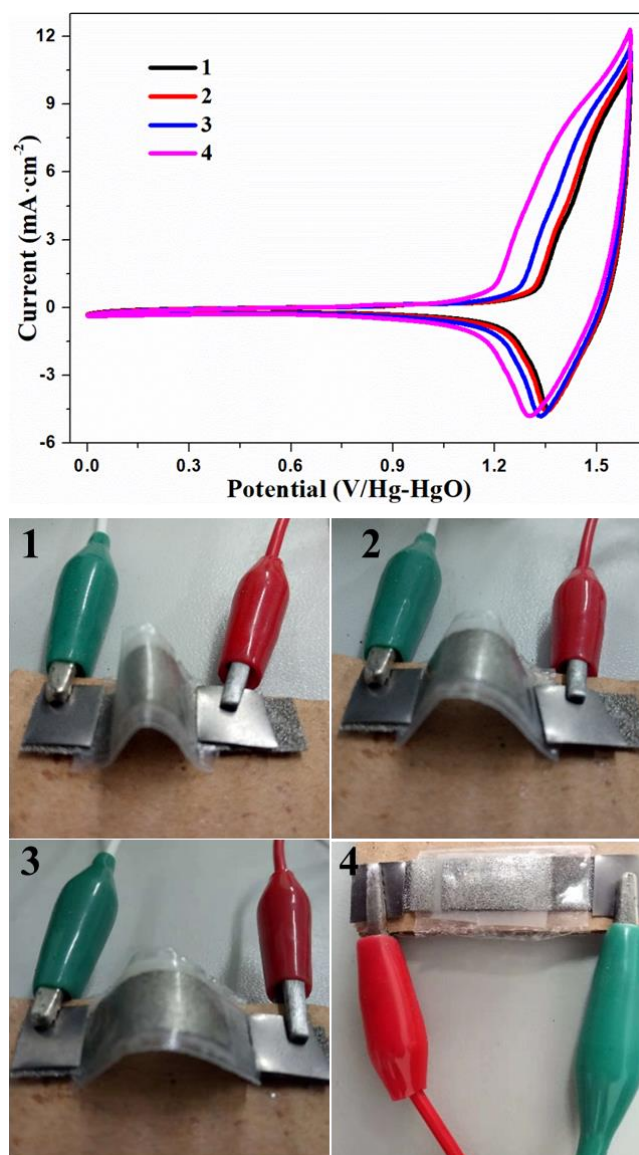

**Figure S13.** Digital images of c-MnSi-2//Ni(OH)<sub>2</sub> ASC bent at various angles and their corresponding CV curves.

**Table S1**

Table S1. Comparison of the specific capacitance of Mn<sub>3</sub>O<sub>4</sub> doped MnSi/C composites and some of other previously reported Mn- and Si- based electrode materials.

| Si- or Mn-based materials                                                        | Electrolyte                           | Potential /V    | Capacitance                                      | Cycling capability    | Ref.             |
|----------------------------------------------------------------------------------|---------------------------------------|-----------------|--------------------------------------------------|-----------------------|------------------|
| Mesoporous-Li <sub>2</sub> MnSiO <sub>4</sub>                                    | 2 M KOH                               | 0~0.55          | 120 F g <sup>-1</sup> , 20 mV·s <sup>-1</sup>    | 85.7% after 500       | 1                |
| Ni <sub>3</sub> Si <sub>2</sub> O <sub>5</sub> (OH) <sub>4</sub> /RGO            | 2 M KOH                               | 0.2~0.6         | 178.9 F g <sup>-1</sup> , 1 A g <sup>-1</sup>    | 97.6% after 5000      | 2                |
| NS-C-CoSiO                                                                       | 3 M KOH                               | -0.05~0.4       | 1600 F g <sup>-1</sup> , 1 A g <sup>-1</sup>     | 99.1% after 6000      | 3                |
| Mn <sub>3</sub> O <sub>4</sub> round shaped nanocrystals                         | 1 M Na <sub>2</sub> SO <sub>4</sub>   | 0~0.5           | 57 F g <sup>-1</sup> , 2 mV·s <sup>-1</sup>      | 81.1% after 1000      | 4                |
| (Ni, Co) <sub>3</sub> Si <sub>2</sub> O <sub>5</sub> (OH) <sub>4</sub>           | 1 M KOH                               | 0~0.5           | 144 F g <sup>-1</sup> , 1 A g <sup>-1</sup>      | 99.3% after 10000     | 5                |
| Manganese silicate drapes                                                        | 1 M KOH                               | -0.5~0.4        | 283 F g <sup>-1</sup> , 0.5 A g <sup>-1</sup>    | 74.7% after 1000      | 6                |
| Co <sub>3</sub> Si <sub>2</sub> O <sub>5</sub> (OH) <sub>4</sub>                 | 6 M KOH                               | 0~0.5           | 570 F g <sup>-1</sup> , 0.7 A g <sup>-1</sup>    | —                     | 7                |
| Co <sub>3</sub> (Si <sub>2</sub> O <sub>5</sub> ) <sub>2</sub> (OH) <sub>2</sub> | 6M KOH                                | 0.1~0.55        | 237 F g <sup>-1</sup> , 5.7 mA cm <sup>-2</sup>  | 95% after 150         | 8                |
| Mn <sub>3</sub> O <sub>4</sub> thin film                                         | 1 M Na <sub>2</sub> SO <sub>4</sub>   | -0.1~0.9        | 314 F g <sup>-1</sup> , 5 mV·s <sup>-1</sup>     | —                     | 9                |
| MnO <sub>2</sub> /ZnO                                                            | 1 M Na <sub>2</sub> SO <sub>4</sub>   | 0~0.8           | 230 mF cm <sup>-2</sup> , 10 mV·s <sup>-1</sup>  | —                     | 10               |
| Cu-doped Mn <sub>3</sub> O <sub>4</sub>                                          | 1 M Na <sub>2</sub> SO <sub>4</sub>   | 0~1             | 134 F g <sup>-1</sup> , 0.5 A g <sup>-1</sup>    | —                     | 11               |
| AMSi/MWCNTs                                                                      | 1 M Na <sub>2</sub> SO <sub>4</sub>   | -0.2~0.8        | 203 F g <sup>-1</sup> , 1 A g <sup>-1</sup>      | 41% after 1000        | 12               |
| MnO <sub>2</sub> /carbon cloth                                                   | 0.1 M Na <sub>2</sub> SO <sub>4</sub> | 0~0.8           | 230, 10 mV s <sup>-1</sup>                       | 98.5% after 3000      | 13               |
| <b>c-MnSi-2</b>                                                                  | <b>3 M KOH</b>                        | <b>-0.9~0.4</b> | <b>108 F g<sup>-1</sup>, 1 A g<sup>-1a</sup></b> | <b>82% after 8400</b> | <b>This work</b> |

M = mol L<sup>-1</sup>;

<sup>a</sup> The capacitance based on the total mass of the active materials on the two electrodes.

## References

1. P. Chaturvedi, A. Kumar, A. Sil and Y. Sharma, *RSC Adv.*, 2015, **5**, 25156-25163.
2. Y. Zhang, W. Zhou, H. Yu, T. Feng, Y. Pu, H. Liu, W. Xiao and L. Tian, *Nanoscale Res. Lett.*, 2017, **12**, 325.
3. X. Li, S. Ding, X. Xiao, J. Shao, J. Wei, H. Pang and Y. Yu, *J. Mater. Chem. A*, 2017, **5**, 12774-12781.
4. D. P. M. D. Shaik, R. Pitcheri, Y. Qiu and O. M. Hussain, *Ceramics International*, 2019, **45**, 2226-2233.
5. Q. Rong, L.-L. Long, X. Zhang, Y.-X. Huang and H.-Q. Yu, *Appl. Energy*, 2015, **153**, 63-69.
6. H.-Y. Wang, Y.-Y. Wang, X. Bai, H. Yang, J.-P. Han, N. Lun, Y.-X. Qi and Y.-J. Bai, *RSC Adv.*, 2016, **6**, 105771-105779.
7. J. Zhao, Y. Zhang, T. Wang, P. Li, C. Wei and H. Pang, *Adv. Mater. Interfaces*, 2014, **2**, 1400377.
8. G.-Q. Zhang, Y.-Q. Zhao, F. Tao and H.-L. Li, *J. Power Sources*, 2006, **161**, 723-729.
9. D. P. Dubal, D. S. Dhawale, R. R. Salunkhe, S. M. Pawar and C. D. Lokhande, *Appl. Surf. Sci.*, 2010, **256**, 4411-4416.
10. W. Zilong, Z. Zhu, J. Qiu and S. Yang, *Journal of Materials Chemistry C*, 2014, **2**, 1331-1336.
11. R. Dong, Q. Ye, L. Kuang, X. Lu, Y. Zhang, X. Zhang, G. Tan, Y. Wen and F. Wang, *ACS Appl. Mater. Interfaces*, 2013, **5**, 9508-9516.
12. Q. Wang, Y. Zhang, S. Jia, Y. Han, J. Xu, F. Li and C. Meng, *Colloid Surf. A-Physicochem. Eng. Asp.*, 2018, **548**, 158-171.
13. Y.-C. Chen, Y.-K. Hsu, Y.-G. Lin, Y.-K. Lin, Y.-Y. Horng, L.-C. Chen and K.-H. Chen, *Electrochimica Acta*, 2011, **56**, 7124-7130.
